# Supplementary material for: Unsupervised Flow Cytometry Analysis Allows for an Accurate Identification of Minimal Residual Disease Assessment in Acute Myeloid Leukemia
Source: PubMed Central journal article supplement (PMC7914957; doi:10.3390/cancers13040629), 2021-02-05
Supplement: cancers-13-00629-s001.pdf [file cancers-13-00629-s001.pdf]

# Unsupervised Flow Cytometry Analysis Allows for an Accurate Identification of Minimal Residual Disease Assessment in Acute Myeloid Leukemia

Jean Philippe Vial, Nicolas Lechevalier, Francis Lacombe, Pierre-Yves Dumas, Audrey Bidet, Thibaut Leguay, François Vergez, Arnaud Pigneux and Marie C Béné

**Table S1.** Complement on patient characteristics

| Patient (#) | WHO classification                            | Molecular markers used for MRD | FLT3 status | Karyotype | Number of FU |
|-------------|-----------------------------------------------|--------------------------------|-------------|-----------|--------------|
| 1           | AML with mutated NPM1 (myelomonocytic)        | <i>NPM1 A</i>                  | ITD         | normal    | 2            |
| 2           | AML with mutated NPM1 (monoblastic/monocytic) | <i>NPM1 A</i>                  | WT          | normal    | 4            |
| 3           | AML with mutated NPM1 (myelomonocytic)        | <i>NPM1 A</i>                  | WT          | normal    | 3            |
| 4           | AML with BCR-ABL                              | <i>NPM1 A</i>                  | WT          | t(9;22)   | 1            |
| 5           | AML with mutated NPM1 (myelomonocytic)        | <i>NPM1 A</i>                  | WT          | normal    | 2            |
| 6           | AML with mutated NPM1 (myelomonocytic)        | <i>NPM1 A</i>                  | WT          | normal    | 1            |
| 7           | AML with mutated NPM1 (with maturation)       | <i>NPM1 A</i>                  | WT          | normal    | 2            |
| 8           | AML with mutated NPM1 (myelomonocytic)        | <i>NPM1 A</i>                  | ITD         | normal    | 2            |
| 9           | AML with mutated NPM1 (monoblastic/monocytic) | <i>NPM1 A</i>                  | WT          | complex   | 2            |
| 10          | AML with mutated NPM1 (myelomonocytic)        | <i>NPM1 A</i>                  | ITD         | normal    | 1            |
| 11          | AML with mutated NPM1 (without maturation)    | <i>NPM1 A</i>                  | ITD         | normal    | 1            |
| 12          | AML with mutated NPM1 (without maturation)    | <i>NPM1 A</i>                  | ITD         | normal    | 1            |
| 13          | AML with mutated NPM1 (monoblastic/monocytic) | <i>NPM1 A</i>                  | WT          | normal    | 1            |
| 14          | AML with mutated NPM1 (myelomonocytic)        | <i>NPM1 A</i>                  | WT          | normal    | 1            |
| 15          | AML with mutated NPM1 (without maturation)    | <i>NPM1 A</i>                  | ITD         | normal    | 3            |
| 16          | AML with mutated NPM1 (myelomonocytic)        | <i>NPM1 A</i>                  | ITD         | normal    | 2            |
| 17          | AML with mutated NPM1 (with maturation)       | <i>NPM1 A</i>                  | WT          | normal    | 2            |
| 18          | AML with mutated NPM1 (monoblastic/monocytic) | <i>NPM1 A</i>                  | TKD         | normal    | 4            |
| 19          | AML with mutated NPM1 (with maturation)       | <i>NPM1 A</i>                  | ITD         | trisomy 8 | 4            |
| 20          | AML with mutated NPM1 (without maturation)    | <i>NPM1 A</i>                  | ITD         | normal    | 2            |
| 21          | AML with mutated NPM1 (without maturation)    | <i>NPM1 A</i>                  | WT          | normal    | 4            |
| 22          | AML with mutated NPM1 (without maturation)    | <i>NPM1 A</i>                  | WT          | normal    | 4            |
| 23          | AML with mutated NPM1 (without maturation)    | <i>NPM1 A</i>                  | ITD         | normal    | 3            |
| 24          | AML with mutated NPM1 (myelomonocytic)        | <i>NPM1 A</i>                  | ITD         | normal    | 1            |
| 25          | AML with mutated NPM1 (monoblastic/monocytic) | <i>NPM1 B</i>                  | WT          | normal    | 2            |
| 26          | AML with mutated NPM1 (monoblastic/monocytic) | <i>NPM1 B</i>                  | ITD         | normal    | 2            |
| 27          | AML with mutated NPM1 (monoblastic/monocytic) | <i>NPM1 B</i>                  | TKD         | normal    | 1            |
| 28          | AML with mutated NPM1 (monoblastic/monocytic) | <i>NPM1 D</i>                  | ITD         | normal    | 1            |
| 29          | AML with mutated NPM1 (myelomonocytic)        | <i>NPM1 D</i>                  | WT          | normal    | 1            |
| 30          | AML with recurrent cytogenetic abnormalities  | <i>RUNX1-RUNX1</i>             | NA          | t(8;21)   | 2            |
| 31          | AML with recurrent cytogenetic abnormalities  | <i>RUNX1-RUNX1</i>             | NA          | t(8;21)   | 5            |
| 32          | AML with recurrent cytogenetic abnormalities  | <i>RUNX1-RUNX1</i>             | NA          | t(8;21)   | 1            |
| 33          | AML with recurrent cytogenetic abnormalities  | <i>RUNX1-RUNX1</i>             | NA          | t(8;21)   | 3            |

|    |                                              |                     |    |         |   |
|----|----------------------------------------------|---------------------|----|---------|---|
| 34 | AML with recurrent cytogenetic abnormalities | <i>RUNX1-RUNXT1</i> | NA | t(8;21) | 5 |
| 35 | AML with recurrent cytogenetic abnormalities | <i>RUNX1-RUNXT1</i> | NA | t(8;21) | 4 |
| 36 | AML with recurrent cytogenetic abnormalities | <i>CBFB-MYH11</i>   | NA | inv(16) | 6 |
| 37 | AML with recurrent cytogenetic abnormalities | <i>CBFB-MYH11</i>   | NA | inv(16) | 2 |
| 38 | AML with recurrent cytogenetic abnormalities | <i>CBFB-MYH11</i>   | NA | inv(16) | 3 |
| 39 | AML with recurrent cytogenetic abnormalities | <i>CBFB-MYH11</i>   | NA | inv(16) | 3 |
| 40 | AML with BCR-ABL                             | <i>BCR-ABL</i>      | NA | t(9;22) | 2 |

**Table S2.** Detailed point by point patient status and results of MRD Assessment.

FU: Follow-up; d: days after diagnosis; FS-SORN: FlowSOM sum of retained nodes; CR: complete remission.

| #  | FU (d) | Disease status | Gene          | Gene/ABL (%) | Molecular MRD | FS-SORN (%) | MFC-MRD |
|----|--------|----------------|---------------|--------------|---------------|-------------|---------|
| 1  | diag   | AML4           | <i>NPM1 A</i> | 892          |               | 63.6        |         |
|    | 39     | CR             |               | 0.0001       | -             | 0           | -       |
|    | 530    | CR             |               | 0.0001       | -             | 0           | -       |
| 2  | diag   | AML5           | <i>NPM1 A</i> | 1120         |               | 56.2        |         |
|    | 74     | CR             |               | 0.0072       | +             | 1.00        | +       |
|    | 162    | CR             |               | 0.0001       | -             | 0           | -       |
|    | 428    | relapse        |               | 1897         | +             | 2.14        | +       |
|    | 470    | CR             |               | 0.0010       | -             | 0           | -       |
| 3  | diag   | AML4           | <i>NPM1 A</i> | 1309         |               | 52.68       |         |
|    | 38     | CR             |               | 0.7174       | +             | 1.55        | +       |
|    | 407    | relapse        |               | 444          | +             | 6.85        | +       |
|    | 837    | CR             |               | 0.006        | +             | 5.00        | +       |
| 4  | diag   | AML2           | <i>NPM1 A</i> | 710          |               | 40.16       |         |
|    | 28     | CR             |               | 0.1029       | +             | 0.23        | +       |
| 5  | diag   | AML MRC        | <i>NPM1 A</i> | 6000         |               | 58.59       |         |
|    | 53     | CR             |               | 0.0142       | +             | 2.7         | +       |
|    | 217    | CR             |               | 0.0051       | +             | 0.23        | +       |
| 6  | diag   | AML4           | <i>NPM1 A</i> | 1317         |               | 73.37       |         |
|    | 39     | CR             |               | 0.1233       | +             | 7.37        | +       |
| 7  | diag   | AML2           | <i>NPM1 A</i> | 1337         |               | 45.44       |         |
|    | 38     | CR             |               | 8.4          | +             | 0.48        | +       |
|    | 148    | CR             |               | 7.57         | +             | 2.36        | +       |
| 8  | diag   | AML4           | <i>NPM1 A</i> | 1623         |               | 65.9        |         |
|    | 36     | refractory     |               | 555          | +             | 8.50        | +       |
| 9  | 198    | relapse        |               | 3337         | +             | 32.53       | +       |
|    | diag   | AML5           | <i>NPM1 A</i> | 1374         |               | 40.19       |         |
|    | 38     | refractory     |               | 0.0001       | -             | 3.87        | +       |
| 10 | 48     | refractory     |               | 0.0001       | -             | 2.33        | +       |
|    | diag   | AML4           | <i>NPM1 A</i> | 3910         |               | 50.45       |         |
| 11 | 44     | refractory     |               | 40           | +             | 0.32        | +       |
|    | diag   | AML1           | <i>NPM1 A</i> | 3647         |               | 63.05       |         |
| 12 | 47     | CR             |               | 0.4539       | +             | 0.13        | +       |
|    | diag   | AML5           | <i>NPM1 A</i> | 2457         |               | 81.71       |         |
| 13 | 38     | CR             |               | 0.8026       | +             | 1.47        | +       |
|    | diag   | AML5           | <i>NPM1 A</i> | 1770         |               | 31.47       |         |
| 14 | 72     | CR             |               | 0.0289       | +             | 1.60        | +       |
|    | diag   | AML5           | <i>NPM1 A</i> | 2533         |               | 41.06       |         |
| 15 | 49     | CR             |               | 0.0001       | -             | 0           | -       |
|    | diag   | AML1           | <i>NPM1 A</i> | 2718         |               | 74.69       |         |
|    | 35     | CR             |               | 44           | +             | 0           | -       |
|    | 68     | CR             |               | 0.001        | -             | 0           | -       |
| 16 | 209    | CR             |               | 0.001        | -             | 0           | -       |
|    | diag   | AML4           | <i>NPM1 A</i> | 2253         |               | 48.33       |         |
|    | 70     | CR             |               | 0.0317       | +             | 0           | -       |

|    |      |         |                           |        |   |       |   |
|----|------|---------|---------------------------|--------|---|-------|---|
|    | 149  | CR      |                           | 0.0251 | + | 0     | - |
| 17 | diag | AML2    | <i>NPM1 A</i>             | 335    |   | 53.01 |   |
|    | 52   | CR      |                           | 0.001  | - | 0     | - |
|    | 91   | CR      |                           | 0.001  | - | 0.77  | + |
| 18 | diag | AML5    | <i>NPM1 A</i>             | 846    |   | 81.13 |   |
|    | 39   | CR      |                           | 0.0685 | + | 1.85  | + |
|    | 74   | CR      |                           | 0.040  | + | 4.76  | + |
|    | 111  | CR      |                           | 0.001  | - | 9.71  | + |
|    | 256  | CR      |                           | 0.001  | - | 5.30  | + |
| 19 | diag | AML2    | <i>NPM1 A</i>             | 1700   |   | 65.72 |   |
|    | 43   | CR      |                           | 0.770  | + | 1.20  | + |
|    | 77   | CR      |                           | 0.000  | - | 0     | - |
|    | 112  | CR      |                           | 0.000  | - | 2.16  | + |
|    | 146  | CR      |                           | 0.000  | - | 0     | - |
| 20 | diag | AML5    | <i>NPM1 A</i>             | 970    |   | 81.14 |   |
|    | 36   | CR      |                           | 0.5742 | + | 0.09  | + |
|    | 76   | CR      |                           | 0.001  | - | 0     | - |
| 21 | diag | AML1    | <i>NPM1 A</i>             | 6220   |   | 45.83 |   |
|    | 39   | CR      |                           | 0.088  | + | 1.43  | + |
|    | 77   | CR      |                           | 0.001  | - | 0     | - |
|    | 112  | CR      |                           | 0.001  | - | 0     | - |
|    | 145  | CR      |                           | 0.001  | - | 0     | - |
| 22 | diag | AML1    | <i>NPM1 A</i>             | 690    |   | 69.56 |   |
|    | 36   | CR      |                           | 2.5    | + | 1.86  | + |
|    | 71   | CR      |                           | 0.04   | + | 3.29  | + |
|    | 106  | CR      |                           | 0.000  | - | 3.53  | + |
|    | 140  | CR      |                           | 0.02   | + | 1.11  | + |
| 23 | diag | AML1    | <i>NPM1 A</i>             | 2176   |   | 76.27 |   |
|    | 61   | CR      |                           | 0.038  | + | 0.96  | + |
|    | 95   | CR      |                           | 0.001  | - | 0     | - |
|    | 138  | CR      |                           | 0.001  | - | 2.06  | + |
| 24 | diag | AML MRC | <i>NPM1 A</i>             | 2665   |   | 50.37 |   |
|    | 49   | CR      |                           | 0.0061 | + | 0.23  | + |
| 25 | diag | AML5    | <i>NPM1 B</i>             | 776    |   | 54.7  |   |
|    | 40   | CR      |                           | 0.0117 | + | 1.52  | + |
|    | 503  | CR      |                           | 0.0001 | - | 0     | - |
| 26 | diag | AML5    | <i>NPM1 B</i>             | 3156   |   | 78.44 |   |
|    | 35   | CR      |                           | 0.9153 | + | 4.76  | + |
|    | 242  | CR      |                           | 0.0001 | - | 3.01  | + |
| 27 | diag | AML5    | <i>NPM1 B</i>             | 2356   |   | 41.44 |   |
|    | 35   | CR      |                           | 0.238  | + | 1.65  | + |
| 28 | diag | AML5    | <i>NPM1 D</i>             | 2015   |   | 78.21 |   |
|    | 39   | CR      |                           | 0.1841 | + | 0     | - |
| 29 | diag | AML4    | <i>NPM1 D</i>             | 1705   |   | 20.18 |   |
|    | 35   | CR      |                           | 3.832  | + | 3.53  | + |
| 30 | diag | AML2    | <i>RUNX1-<br/>RUNX1T1</i> | 209    |   | 30.26 |   |
|    | 39   | CR      |                           | 2.938  | + | 2.07  | + |
|    | 190  | relapse |                           | 488    | + | 9.17  | + |

|    |      |            |                           |        |   |       |   |
|----|------|------------|---------------------------|--------|---|-------|---|
| 31 | diag | AML2       | <i>RUNX1-<br/>RUNX1T1</i> | 329    |   | 60.54 |   |
|    | 44   | CR         |                           | 2.525  | + | 0     | - |
|    | 73   | CR         |                           | 0.1989 | + | 0     | - |
|    | 167  | CR         |                           | 36     | + | 0.17  | + |
|    | 199  | relapse    |                           | 147    | + | 20.62 | + |
|    | 341  | CR         |                           | 0.0001 | - | 0     | - |
| 32 | diag | AML2       | <i>RUNX1-<br/>RUNX1T1</i> | 348    |   | 43.62 |   |
|    | 39   | CR         |                           | 5.567  | + | 0.63  | + |
| 33 | diag | AML2       | <i>RUNX1-<br/>RUNX1T1</i> | 1262   |   | 82.9  |   |
|    | 37   | CR         |                           | 29     | + | 0.82  | + |
|    | 104  | CR         |                           | 1.861  | + | 0.96  | + |
|    | 125  | CR         |                           | 1.412  | + | 1.34  | + |
| 34 | diag | AML2       | <i>RUNX1-<br/>RUNX1T1</i> | 1372   |   | 58.89 |   |
|    | 38   | CR         |                           | 2.952  | + | 2.08  | + |
|    | 75   | CR         |                           | 0.725  | + | 1.92  | + |
|    | 115  | CR         |                           | 0.073  | + | 3.29  | + |
|    | 144  | CR         |                           | 0.115  | + | 0     | - |
|    | 322  | CR         |                           | 9.6    | + | 0.65  | + |
| 35 | diag | AML2       | <i>RUNX1-<br/>RUNX1T1</i> | 584    |   | 31.13 |   |
|    | 33   | CR         |                           | 0.96   | + | 1.98  | + |
|    | 68   | CR         |                           | 0.145  | + | 1.26  | + |
|    | 103  | CR         |                           | 0.0135 | + | 0.23  | + |
|    | 139  | CR         |                           | 0.0001 | - | 0     | - |
| 36 | diag | AML4       | <i>CBFB-MYH11</i>         | 243    |   | 55.93 |   |
|    | 42   | CR         |                           | 0.0137 | + | 3.60  | + |
|    | 78   | CR         |                           | 0.022  | + | 0     | - |
|    | 463  | CR         |                           | 0.061  | + | 0     | - |
|    | 492  | relapse    |                           | 0.012  | + | 0.38  | + |
|    | 533  | CR         |                           | 0.012  | + | 0.67  | + |
|    | 654  | relapse    |                           | 0.0001 | - | 0     | - |
| 37 | diag | AML4       | <i>CBFB-MYH11</i>         | 107    |   | 62.94 |   |
|    | 35   | CR         |                           | 0.204  | + | 1.43  | + |
|    | 97   | CR         |                           | 0.21   | + | 2.11  | + |
| 38 | diag | AML4       | <i>CBFB-MYH11</i>         | ND     |   | 43.40 |   |
|    | 39   | CR         |                           | 0.008  | + | 1.93  | + |
|    | 181  | CR         |                           | 0.01   | + | 0     | - |
|    | 277  | CR         |                           | 0.0001 | - | 0     | - |
| 39 | diag | AML4       | <i>CBFB-MYH11</i>         | 84     |   | 20.60 |   |
|    | 40   | CR         |                           | 0.11   | + | 2.03  | + |
|    | 74   | CR         |                           | 0.055  | + | 1.16  | + |
|    | 111  | CR         |                           | 0.017  | + | 0.89  | + |
| 40 | diag | A-CML      | <i>BCR-ABL</i>            | 127    |   | 22.41 |   |
|    | 63   | refractory |                           | 84     | + | 6.51  | + |
|    | 91   | CR         |                           | 82     | + | 3.22  | + |

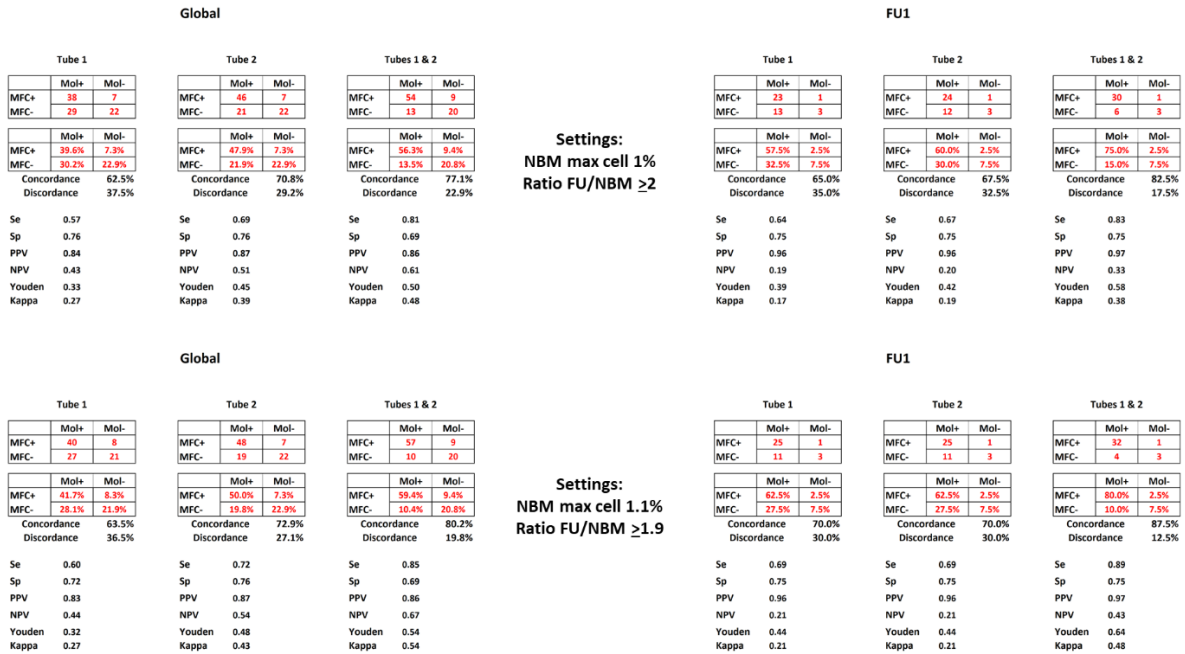

**Figure S1:** Display of the results for all 96 time points and FU1 of the 40 patients with different threshold parameters. Top panel: settings derived from published data (15). Bottom panel: optimized setting according to Youden and kappa tests (as in Figure 2). Matrices of numbers and percentages of concordance between molecular and MFC MRD detection are shown for tube 1, tube 2 and the combination of both tubes. Se: sensitivity, Sp: specificity, PPV: positive predictive value, NPV: negative predictive value. Youden and kappa tests were used and values displayed as well.

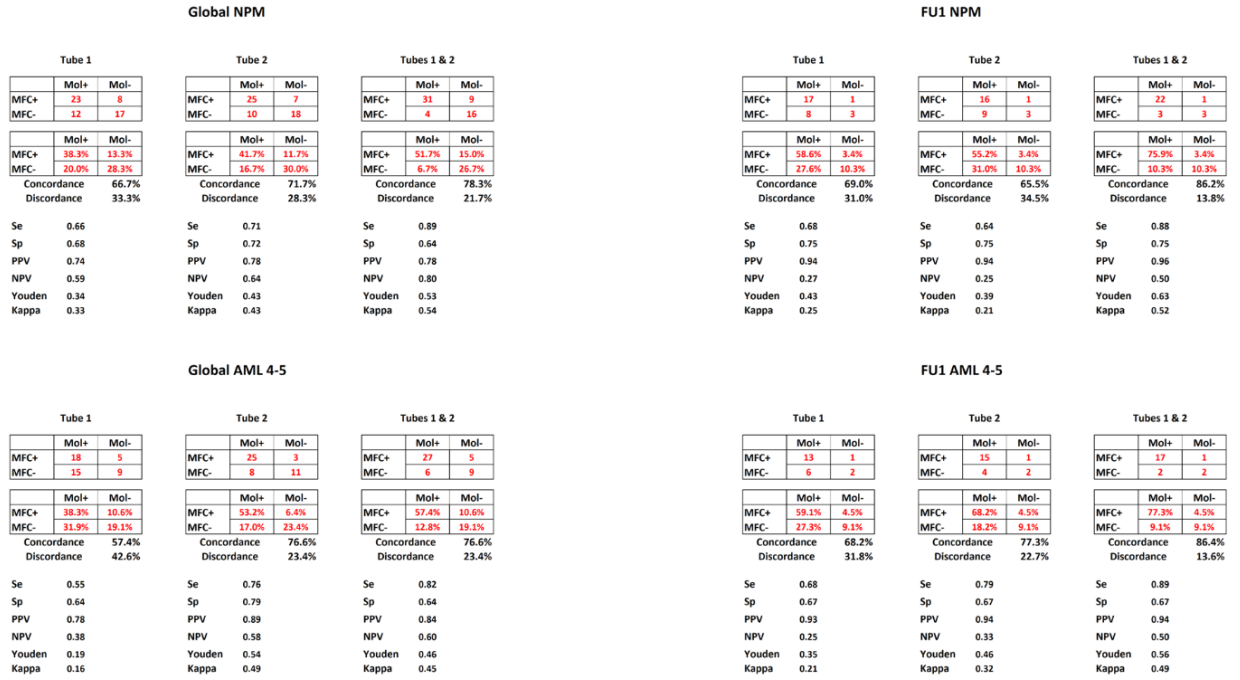

**Figure S2:** Display of the results for two different subgroups of patients. Top panel: Patients with NPM1 mutation only according to all time points (N=60) or FU1 only (N=29). Bottom panel: Patients with AML4 and AML5 (myelomonocytic) only according to all time points (N=47) or FU1 only (N=22). Matrices of numbers and percentages of concordance between molecular and MFC MRD detection are shown for tube 1, tube 2 and the combination of both tubes. Se: sensitivity, Sp: specificity, PPV: positive predictive value, NPV: negative predictive value. Youden and kappa tests were used and values displayed as well.

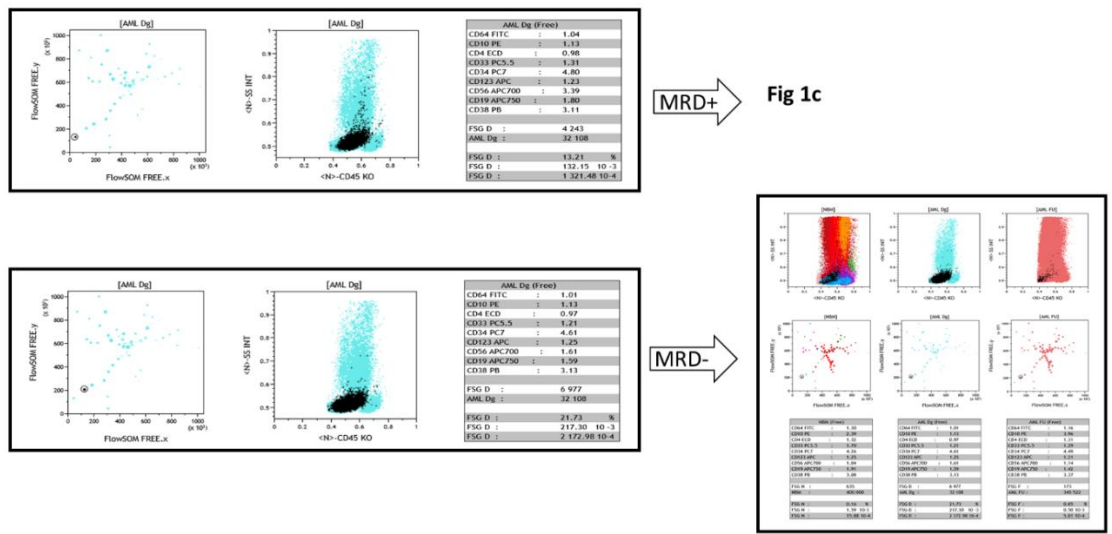

**Figure S3:** Unsupervised delineation of two adjacent but distinct nodes identifying subclones with different LAIP at diagnosis, respectively CD56-positive (top) and CD56-negative (bottom). The black backgating of each node on the CD45/SSC Dg histogram would not allow to distinguish these populations with classical MCF. FlowSOM identifies positive MRD for the CD56+ subclone (shown in Figure 1c) but MRD is undetectable for the CD56-subclone.
